# Supplementary material
Source: HighWire-hosted journal article supplement (https://bmjopen.bmj.com/content/11/7/e047679)
Supplement: inline-supplementary-material-2 [file inline-supplementary-material-2.pdf]

|                                                                                   |                                               |                                                                                     |
|-----------------------------------------------------------------------------------|-----------------------------------------------|-------------------------------------------------------------------------------------|
|  | <b>Patient Questionnaire</b><br>(Page 1 of 3) |  |
|-----------------------------------------------------------------------------------|-----------------------------------------------|-------------------------------------------------------------------------------------|

Dear patient,

Thank you for supporting our survey!

In the following questionnaire, you will find parameters, which were considered relevant for patients in recent studies. We are interested in your views and beliefs concerning these parameters! Please indicate the relevance of each parameter from your personal perspective.

**Please provide some personal information first:**

Age in years:     |\_|\_|

Sex:               \_0 male               \_1 female               \_2 divers

Employment status: \_0 in training               \_1 employed               \_2 seeking work               \_3 retired

Chronically ill:     \_0 no               \_1 yes, namely: \_\_\_\_\_

| Body and mind:<br>How relevant are the following<br>parameters to you? | not<br>rele-<br>vant | rather<br>not<br>rele-<br>vant | neither<br>nor | rather<br>rele-<br>vant | highly<br>rele-<br>vant | unsure<br>what this<br>parameter<br>means |
|------------------------------------------------------------------------|----------------------|--------------------------------|----------------|-------------------------|-------------------------|-------------------------------------------|
| Symptom relief                                                         | 0                    | 1                              | 2              | 3                       | 4                       | 5                                         |
| Pain relief                                                            | 0                    | 1                              | 2              | 3                       | 4                       | 5                                         |
| Prevention of comorbidity                                              | 0                    | 1                              | 2              | 3                       | 4                       | 5                                         |
| Physiological function (objective)                                     | 0                    | 1                              | 2              | 3                       | 4                       | 5                                         |
| Physical function (self-perceived)                                     | 0                    | 1                              | 2              | 3                       | 4                       | 5                                         |
| Sexuality / sexual function                                            | 0                    | 1                              | 2              | 3                       | 4                       | 5                                         |
| Mobility                                                               | 0                    | 1                              | 2              | 3                       | 4                       | 5                                         |
| Sleep behavior                                                         | 0                    | 1                              | 2              | 3                       | 4                       | 5                                         |
| Cognitive performance                                                  | 0                    | 1                              | 2              | 3                       | 4                       | 5                                         |
| Mental health                                                          | 0                    | 1                              | 2              | 3                       | 4                       | 5                                         |
| Survival / mortality                                                   | 0                    | 1                              | 2              | 3                       | 4                       | 5                                         |

|                                                                                                                                 |                                                       |                                                                                                                                                                          |
|---------------------------------------------------------------------------------------------------------------------------------|-------------------------------------------------------|--------------------------------------------------------------------------------------------------------------------------------------------------------------------------|
|  <p><b>uni</b>versität<br/>Witten/Herdecke</p> | <p><b>Patient Questionnaire</b><br/>(Page 2 of 3)</p> |  <p>Lehrstuhl für<br/>Allgemeinmedizin<br/>und Interprofessionelle<br/>Versorgung</p> |
|---------------------------------------------------------------------------------------------------------------------------------|-------------------------------------------------------|--------------------------------------------------------------------------------------------------------------------------------------------------------------------------|

| Personality and social life:<br>How relevant are the following parameters to you? | not relevant | rather not relevant | neither nor | rather relevant | highly relevant | unsure what this parameter means |
|-----------------------------------------------------------------------------------|--------------|---------------------|-------------|-----------------|-----------------|----------------------------------|
| Coping                                                                            | 0            | 1                   | 2           | 3               | 4               | 5                                |
| Disease control                                                                   | 0            | 1                   | 2           | 3               | 4               | 5                                |
| Self-efficacy                                                                     | 0            | 1                   | 2           | 3               | 4               | 5                                |
| Generic quality of life                                                           | 0            | 1                   | 2           | 3               | 4               | 5                                |
| Disease-specific quality of life                                                  | 0            | 1                   | 2           | 3               | 4               | 5                                |
| Positive body image perception                                                    | 0            | 1                   | 2           | 3               | 4               | 5                                |
| Independence                                                                      | 0            | 1                   | 2           | 3               | 4               | 5                                |
| Communication skills                                                              | 0            | 1                   | 2           | 3               | 4               | 5                                |
| Participation in daily life                                                       | 0            | 1                   | 2           | 3               | 4               | 5                                |
| Working ability                                                                   | 0            | 1                   | 2           | 3               | 4               | 5                                |
| Ability to perform sports                                                         | 0            | 1                   | 2           | 3               | 4               | 5                                |
| Ability to fulfill social functions (e.g., being a mother)                        | 0            | 1                   | 2           | 3               | 4               | 5                                |

| Diagnosis and care processes:<br>How relevant are the following parameters to you? | not relevant | rather not relevant | neither nor | rather relevant | highly relevant | unsure what this parameter means |
|------------------------------------------------------------------------------------|--------------|---------------------|-------------|-----------------|-----------------|----------------------------------|
| Reliable diagnosis and therapy                                                     | 0            | 1                   | 2           | 3               | 4               | 5                                |
| Clear therapeutic decision                                                         | 0            | 1                   | 2           | 3               | 4               | 5                                |
| Confidence in therapy                                                              | 0            | 1                   | 2           | 3               | 4               | 5                                |
| Optimal support (devices, professionals)                                           | 0            | 1                   | 2           | 3               | 4               | 5                                |
| Satisfaction with care                                                             | 0            | 1                   | 2           | 3               | 4               | 5                                |
| Avoidance of adverse events                                                        | 0            | 1                   | 2           | 3               | 4               | 5                                |
| Frequency of healthcare service utilization                                        | 0            | 1                   | 2           | 3               | 4               | 5                                |
| Avoidance of hospitalization                                                       | 0            | 1                   | 2           | 3               | 4               | 5                                |
| Avoidance of reoperation / revision                                                | 0            | 1                   | 2           | 3               | 4               | 5                                |

|                                                                                                                                 |                                                       |                                                                                                                                                                          |
|---------------------------------------------------------------------------------------------------------------------------------|-------------------------------------------------------|--------------------------------------------------------------------------------------------------------------------------------------------------------------------------|
|  <p>uni<u>versität</u><br/>Witten/Herdecke</p> | <p><b>Patient Questionnaire</b><br/>(Page 3 of 3)</p> |  <p>Lehrstuhl für<br/>Allgemeinmedizin<br/>und Interprofessionelle<br/>Versorgung</p> |
|---------------------------------------------------------------------------------------------------------------------------------|-------------------------------------------------------|--------------------------------------------------------------------------------------------------------------------------------------------------------------------------|

**To your opinion, are there any relevant parameters missing?**

<sub>0</sub> no                      <sub>1</sub> yes, namely: \_\_\_\_\_

\_\_\_\_\_

\_\_\_\_\_

\_\_\_\_\_

**For what reasons did you visit the doctor today?**

<sub>0</sub> chronic disease

<sub>1</sub> acute disease

<sub>2</sub> prevention / vaccination

<sub>3</sub> other

**THANK YOU FOR YOUR SUPPORT!**
